# Supplementary material for: A Cd-reduced hybrid buffer layer of CdS/Zn(O,S) for environmentally friendly CIGS solar cells
Source: Royal Society of Chemistry journal article supplement (doi:10.1039/c7se00348j), 2017-01-01
Supplement: c7se00348j1.pdf [file c7se00348j1.pdf]

## Supplementary Information

### **Cd-reduced Hybrid Buffer Layer of CdS/Zn(O,S) for Environment-friendly CIGS Solar Cell**

Tanka Raj Rana<sup>1</sup>, [SeongYeon Kim<sup>1</sup>](#), JunHo Kim<sup>1</sup>, Kihwan Kim<sup>2</sup>, Jae Ho Yun<sup>2</sup>

<sup>1</sup>Department of Physics, Incheon National University, 119 Academy-ro, Yeonsu-gu, Incheon 22012, Republic of Korea

<sup>2</sup>Photovoltaic Laboratory, Korea Institute of Energy Research (KIER), 152 Gajeong-ro, Yuseong-gu, Daejeon 34129, Republic of Korea

Email: [jhk@inu.ac.kr](mailto:jhk@inu.ac.kr)

**Table S1.** Electrical parameters of solar cells with Zn(O,S) buffers fabricated by using different rf powers to the ZnO and ZnS targets; 40 W (A), 30W (B), 20W (C) and 15W (D) were applied for ZnO targets and rf power for ZnS target was kept constant at 15W.

| Samples | V <sub>oc</sub><br>(V) | J <sub>sc</sub><br>(mA/cm <sup>2</sup> ) | F.F<br>(%) | η<br>(%) |
|---------|------------------------|------------------------------------------|------------|----------|
| A       | 0.21                   | 26.12                                    | 49.90      | 2.72     |
| B       | 0.29                   | 18.79                                    | 56.27      | 3.09     |
| C       | 0.44                   | 23.65                                    | 50.37      | 5.34     |
| D       | 0.58                   | 22.05                                    | 44.83      | 5.73     |

**Table S2.** Defect levels in CIGS solar cell reported in articles.

| Defect energy (meV) | Characterization method | Assignments                      | References |
|---------------------|-------------------------|----------------------------------|------------|
| 73                  | DLTS                    | In <sub>Cu</sub>                 | 1          |
| 8.4                 | DLTS                    | Cd <sub>Cu</sub>                 | 1          |
| 440                 | DLTS                    | Foreign impurity                 | 1          |
| 470, 340, 340       | DLTS                    | In <sub>Cu</sub> (+/+++)         | 2          |
| 320, 250, 240       | DLTS                    | In <sub>Cu</sub> (0/++)          | 2          |
| 300                 | AS                      | V <sub>Se</sub> +V <sub>Cu</sub> | 3          |
| 300                 | TPC                     | V <sub>Se</sub> +V <sub>Cu</sub> | 4          |
| 25                  | AS                      | V <sub>Cu</sub>                  | 5          |
| 110                 | AS                      | (In, Ga) <sub>Cu</sub>           | 5          |
| 60, 70              | AS                      | V <sub>Se</sub>                  | 6          |
| 250                 | AS                      | In <sub>Cu</sub> (0/++)          | 6          |

[1] I. Choi, C. Choi, J. Lee, Phys. Status Solidi A 209 (2012), pp. 1192-1197.

[2] I. Choi, Thin Solid Films 578 (2015), pp. 98-102.

[3] T. Sakurai , M. M. Islam , H. Uehigashi , S. Ishizuka, A. Yamada, K. Matsubara , S. Niki , K. Akimoto, Sol. Energy Mat. Sol. Cells 95 (2011), pp. 227–230

[4] A. Urbaniak, M. Igalson, Thin Solid Films 517 (2009), pp. 2231-2234.

[5] Q. Cao, O. Gunawan, M. Copel, K.B. Reuter, S.J. Chey, V.R. Deline, D.B. Mitzi, Adv. Energy Mater.1 (2011), pp. 845.

[6] Y. Kim, I. Choi, Current Appl. Phys. 16 (2016), 267-272.

Crystal structure of fabricated ZnO, ZnS and Zn(O,S) thin films. Here, thin films were deposited on soda lime glass for longer time to get thick films (~500nm) for XRD and Raman signal.

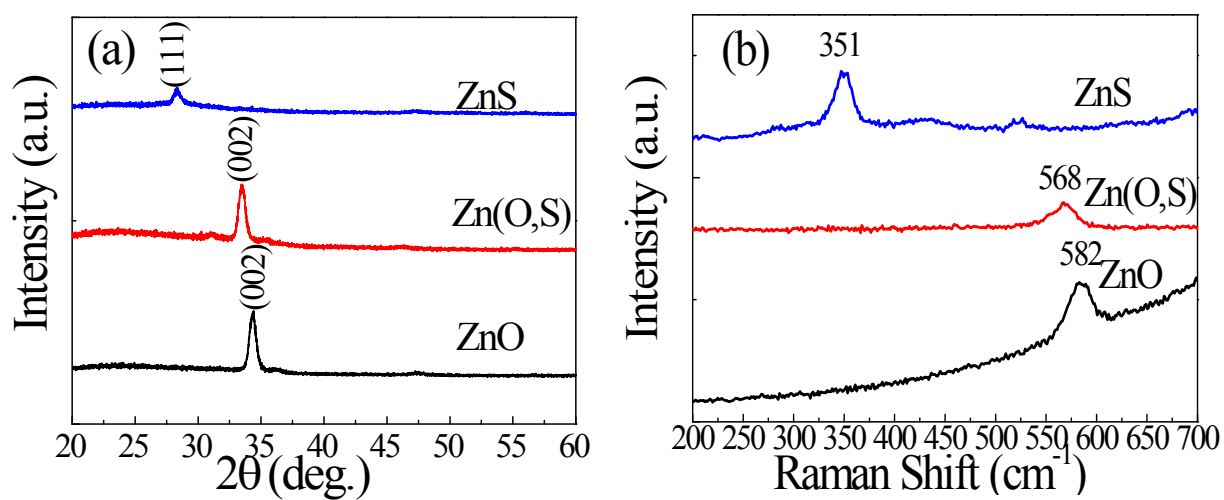

**Figure S1.** XRD spectra of thin films deposited by sputtering of ZnO, ZnS and Co-sputtering of both targets (a) and their Raman spectra (b).

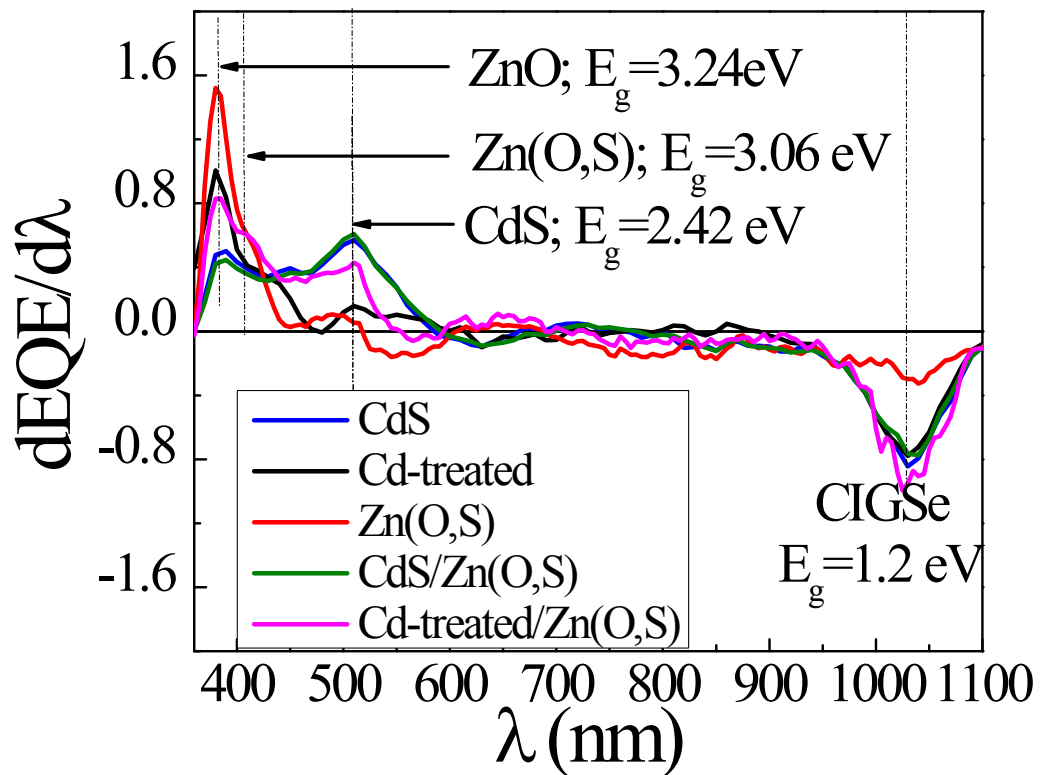

**Figure S2.** The first derivative of the EQE spectra with respect to wavelength.

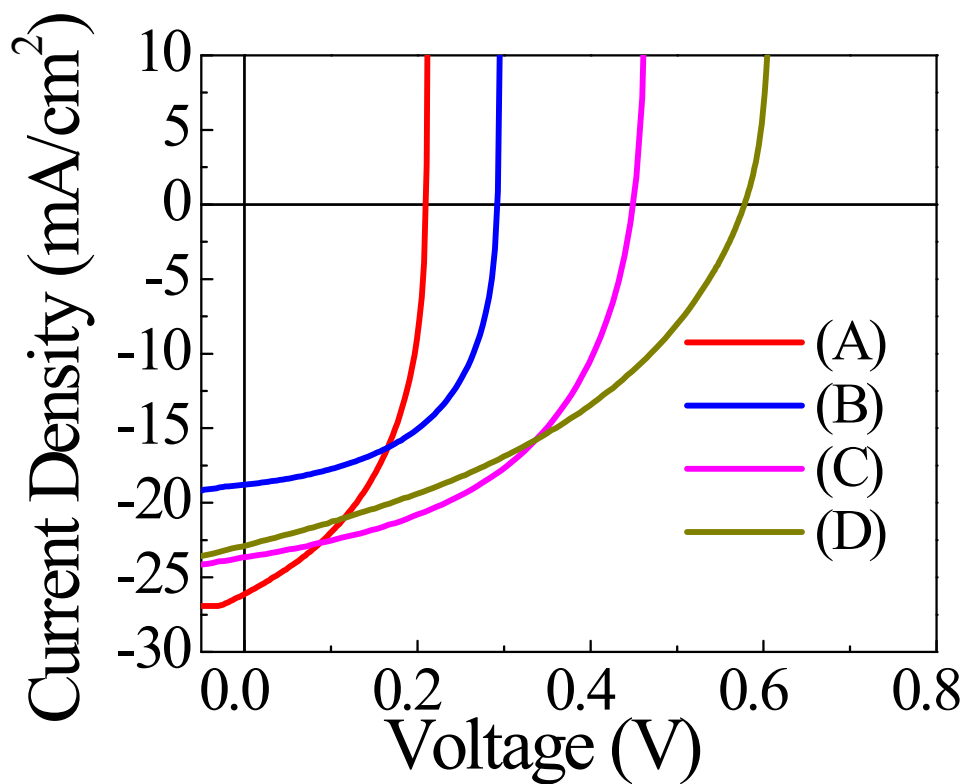

**Figure S3.** J-V characteristics of solar cells with Zn(O,S) buffer fabricated by using different rf powers; 40 W (A), 30W (B), 20W (C) and 15W (D) were applied for ZnO targets and rf power for ZnS target was kept constant at 15W.

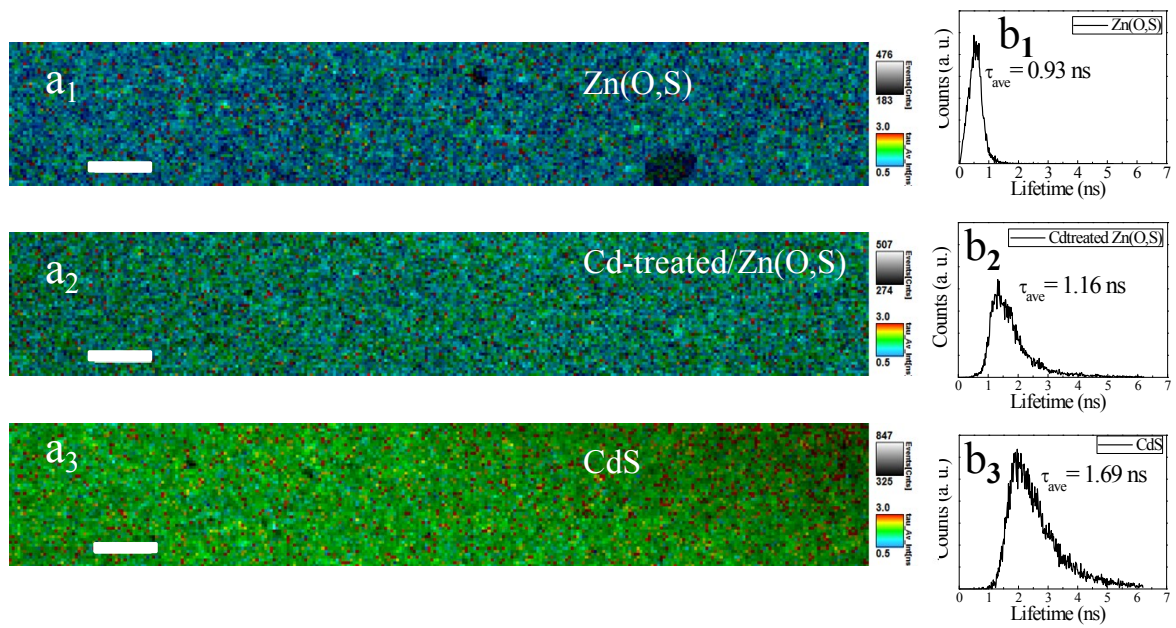

**Fig. S4** Results of carrier lifetime measurement for CIGS/Zn(O,S)/i-ZnO, CIGS/Cd-treated/Zn(O,S)/i-ZnO and CIGS/CdS/i-ZnO: (a<sub>1</sub>-a<sub>3</sub>) TRPL life time mapping and (b<sub>1</sub>-b<sub>3</sub>) histograms of average life time. The scale bar in TRPL mapping image is 20 μm.
